# Supplementary material for: Determining the link between hygroscopicity and composition for semi-volatile aerosol species
Source: Copernicus journal article supplement (doi:10.5194/amt-2018-17), 2018-01-30
Supplement: Supplementary file [file amt-2018-17-AC1-supplement.zip]

# Supporting information for Determining the link between hygroscopicity and composition for semi-volatile aerosol species

Joel Alroe<sup>1</sup>, Luke T. Cravigan<sup>1</sup>, Marc D. Mallet<sup>1</sup>, Zoran D. Ristovski<sup>1</sup>, Branka Miljevic<sup>1</sup>, Chiemiwo G. Osuagwu<sup>1</sup>, and Graham R. Johnson<sup>1</sup>

5 <sup>1</sup>School of Chemistry, Physics and Mechanical Engineering, Queensland University of Technology, Queensland, Brisbane, 4001

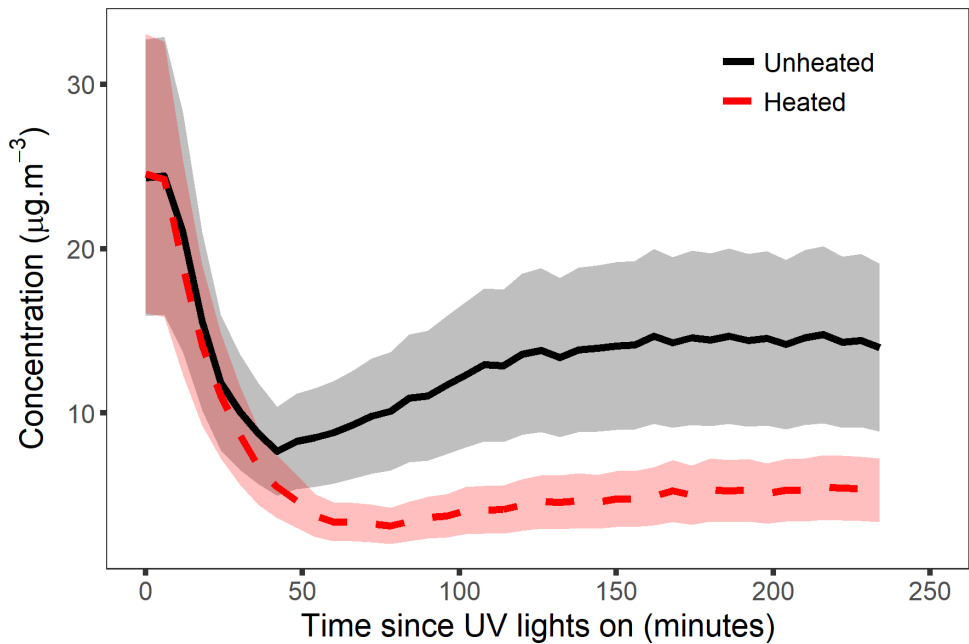

10 **Figure S1: Total non-refractory mass concentrations observed during seeded SOA formation, at both ambient temperature and after heating the sample to 120°C. The shaded area represents the cumulative uncertainties in each major AMS species.**

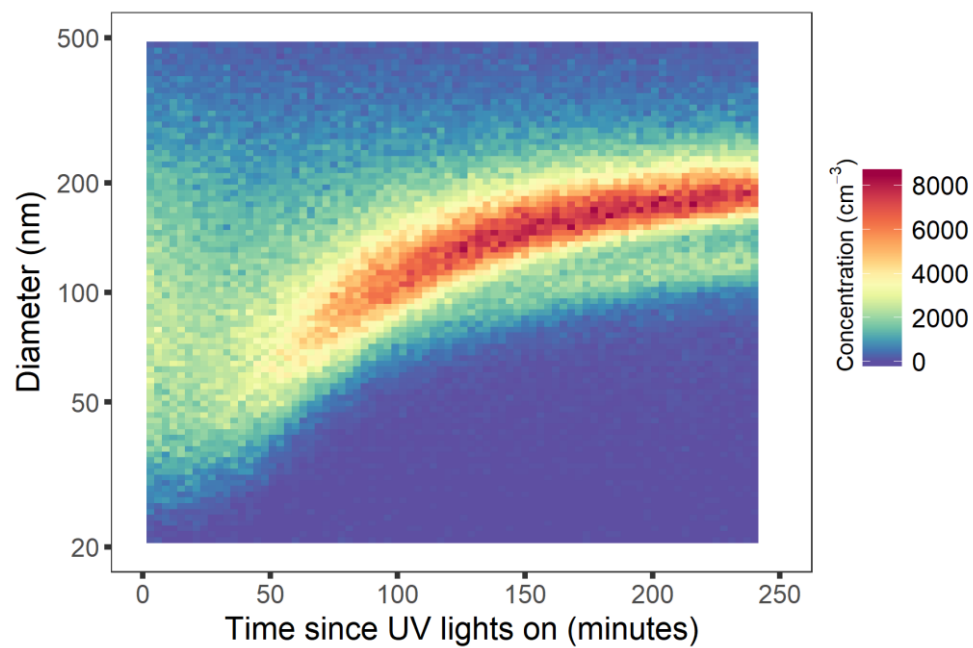

**Figure S2: Size distributions of particle number concentration observed during four hours of  $\alpha$ -pinene SOA formation on polydisperse AS seed particles.**

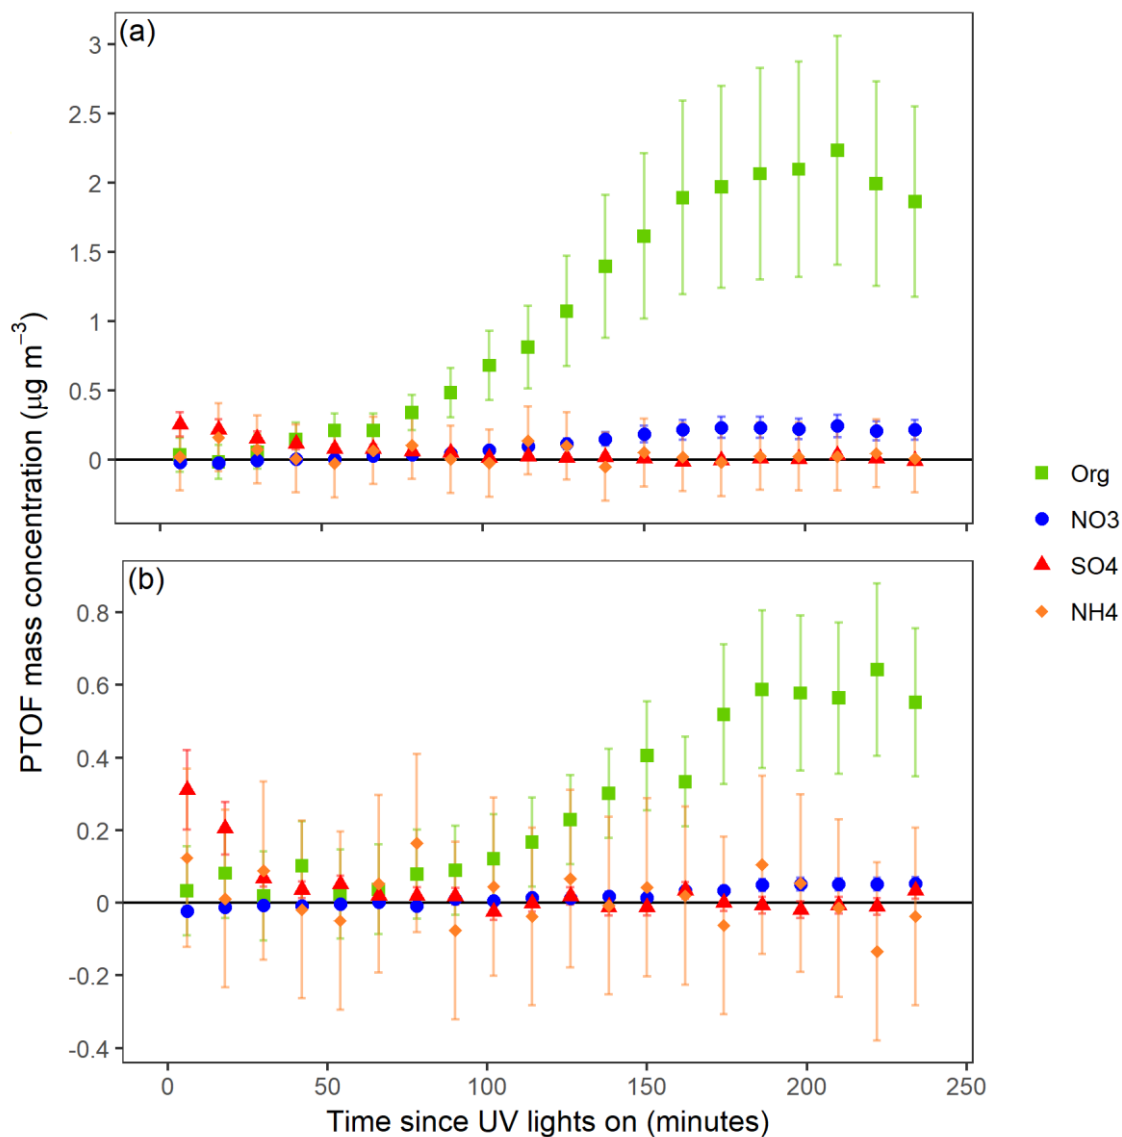

**Figure S3: Size-resolved mass concentrations of major AMS species (excluding Chl) observed during seeded SOA formation, when sampling through (a) an unheated line and (b) a thermodenuder heated to 120°C. Concentrations have been restricted to aerosol with  $130 < d_{va} < 180$  nm. The error bars represent the larger value of either their respective detection limits or estimated uncertainties of 37% for organics, 35% for SO<sub>4</sub> and Chl, and 33% for NO<sub>3</sub> and NH<sub>4</sub>.**
